# Supplementary material for: Electron transport layer assisted by nickel chloride hexahydrate for open-circuit voltage improvement in MAPbI3 perovskite solar cells
Source: Royal Society of Chemistry journal article supplement (doi:10.1039/d2ra01913b), 2022-01-01
Supplement: d2ra01913b1.pdf [file d2ra01913b1.pdf]

## *Electronic supplementary information*

# Electron Transport Layer Assisted by Nickel Chloride Hexahydrate for Open-Circuit Voltage Improvement in MAPbI<sub>3</sub> Perovskite Solar Cells

Pei Dong, Shuai Yuan, Dongping Zhu, Yaxin Du, Cheng Mu\* and Xi-Cheng Ai\*

Key Laboratory of Advanced Light Conversion Materials and Biophotonics,  
Department of Chemistry, Renmin University of China, Beijing 100872, China.

E-mail: cmu@ruc.edu.cn (Cheng Mu); xcai@ruc.edu.cn (Xi-Cheng Ai)

**Keywords:** Perovskite solar cells, Electron transporting layers, MAPbI<sub>3</sub>, Nickel chloride, Photovoltaic

**Table S1.** The main parameters of O 1s peak in different SnO<sub>2</sub> films.

| SnO <sub>2</sub> films               | Peak type     | Peak position (eV) | Percentage (%) |
|--------------------------------------|---------------|--------------------|----------------|
| SnO <sub>2</sub>                     | O (vacancies) | 531.70             | 35.35          |
|                                      | O (lattice)   | 530.46             | 64.65          |
| SnO <sub>2</sub> - NiCl <sub>2</sub> | O (vacancies) | 531.76             | 31.08          |
|                                      | O (lattice)   | 530.53             | 68.92          |

**Table S2.** Fitting parameters of the exponential decay function in TRPL spectra.

| Samples                                   | $A_1$ | $\tau_1$ | $A_2$ | $\tau_2$ | $\tau_{ave}$ |
|-------------------------------------------|-------|----------|-------|----------|--------------|
| FTO/PVK                                   | 0.423 | 11.74    | 0.577 | 198.3    | 119.4        |
| SnO <sub>2</sub> /PVK                     | 0.088 | 22.96    | 0.881 | 75.35    | 70.62        |
| SnO <sub>2</sub> - NiCl <sub>2</sub> /PVK | 0.084 | 47.48    | 0.867 | 112.9    | 107.1        |

**Table S3.** Fitted parameters for the EIS measurements acquired under dark for different samples.

| Sample                         | $R_s$ ( $\Omega \text{ cm}^2$ ) | $R_{rec}$ ( $\Omega \text{ cm}^2$ ) |
|--------------------------------|---------------------------------|-------------------------------------|
| $\text{SnO}_2$                 | 1.06                            | $8.17 \times 10^3$                  |
| $\text{SnO}_2 - \text{NiCl}_2$ | 2.63                            | $1.47 \times 10^4$                  |

**Table S4.** Band gaps ( $E_g$ ), secondary–electron cutoff ( $E_{\text{cutoff}}$ ), fermi edge ( $E_{F, \text{edge}}$ ), fermi level ( $E_F$ ), valence band ( $E_{\text{VB}}$ ) and conduction band ( $E_{\text{CB}}$ ) for SnO<sub>2</sub> and SnO<sub>2</sub>-NiCl<sub>2</sub> films.

| Samples                             | $E_g$ (eV) | $E_{\text{cutoff}}$ (eV) | $E_F$ (eV) | $E_{F, \text{edge}}$ (eV) | $E_{\text{VB}}$ (eV) | $E_{\text{CB}}$ (eV) |
|-------------------------------------|------------|--------------------------|------------|---------------------------|----------------------|----------------------|
| SnO <sub>2</sub>                    | 4.12       | 16.76                    | 4.46       | 3.51                      | 7.97                 | 3.85                 |
| SnO <sub>2</sub> -NiCl <sub>2</sub> | 4.15       | 16.68                    | 4.54       | 3.41                      | 7.95                 | 3.80                 |

The  $E_{\text{cutoff}}$  of SnO<sub>2</sub> and SnO<sub>2</sub>-NiCl<sub>2</sub> films are 16.76 and 16.68 eV, respectively. we calculate as  $E_F = E_{\text{cutoff}} - 21.22$  eV, where  $E_{\text{cutoff}}$  is the high binding energy cutoff to get the Fermi level ( $E_F$ ), and 21.22 eV is emission energy from He irradiation. The  $E_F$  of SnO<sub>2</sub> and SnO<sub>2</sub>-NiCl<sub>2</sub> films are calculated as  $-4.46$  and  $-4.54$  eV, respectively. The  $E_{F, \text{edge}}$  of SnO<sub>2</sub> and SnO<sub>2</sub>-NiCl<sub>2</sub> films are 3.51 and 3.41 eV, respectively. The  $E_{\text{VB}}$  of SnO<sub>2</sub> and SnO<sub>2</sub>-NiCl<sub>2</sub> films are  $-7.97$  and  $-7.95$  eV, calculating as  $E_{\text{VB}} = E_F - E_{F, \text{edge}}$  (Fermi edge). According to the absorption spectrum and Tauc plot, we get the band gap ( $E_g$ ) of SnO<sub>2</sub> (4.12 eV) and SnO<sub>2</sub>-NiCl<sub>2</sub> (4.15 eV).  $E_{\text{CB}}$  obtained from  $E_g$  and  $E_{\text{VB}}$  is  $-3.85$  and  $-3.80$  eV, respectively.

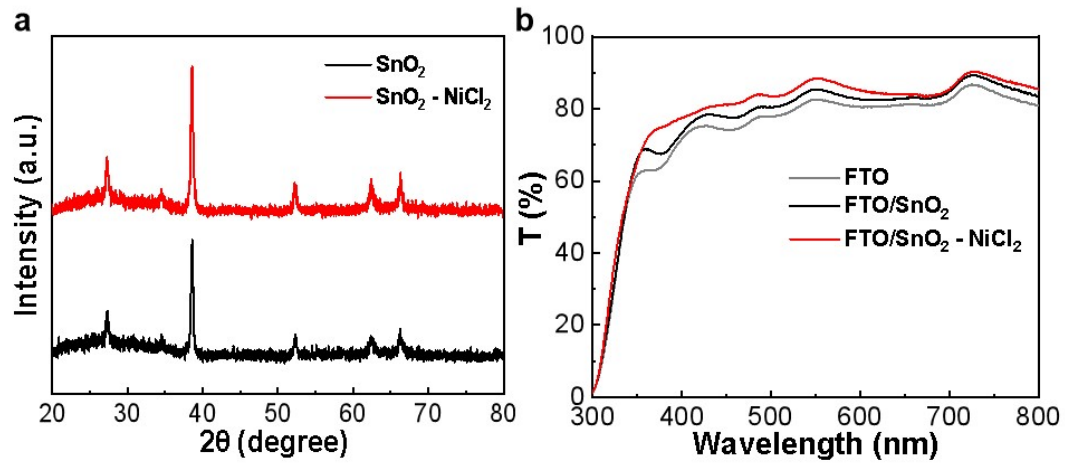

**Figure S1.** (a) The XRD pattern of  $\text{SnO}_2$  without and with  $\text{NiCl}_2$ . (b) The Transmission spectrum of FTO, FTO/ $\text{SnO}_2$  and FTO/ $\text{SnO}_2\text{-NiCl}_2$  substrate, respectively.

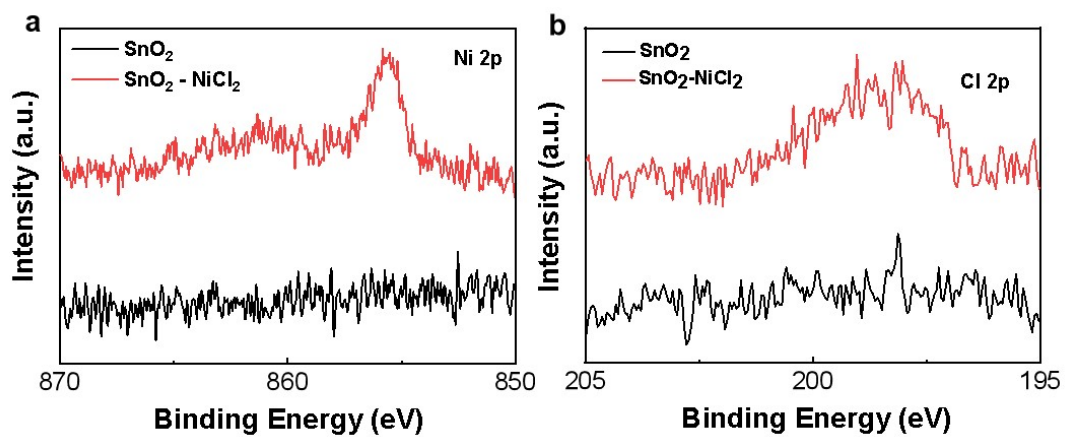

**Figure S2.** (a) X-ray photoelectron spectroscopy (XPS) of Ni 2p. (b) XPS of Cl 2p.

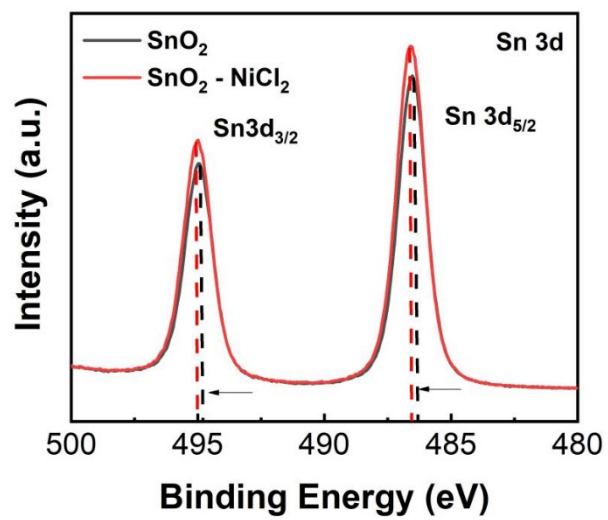

Figure S3. XPS of Sn 3d.



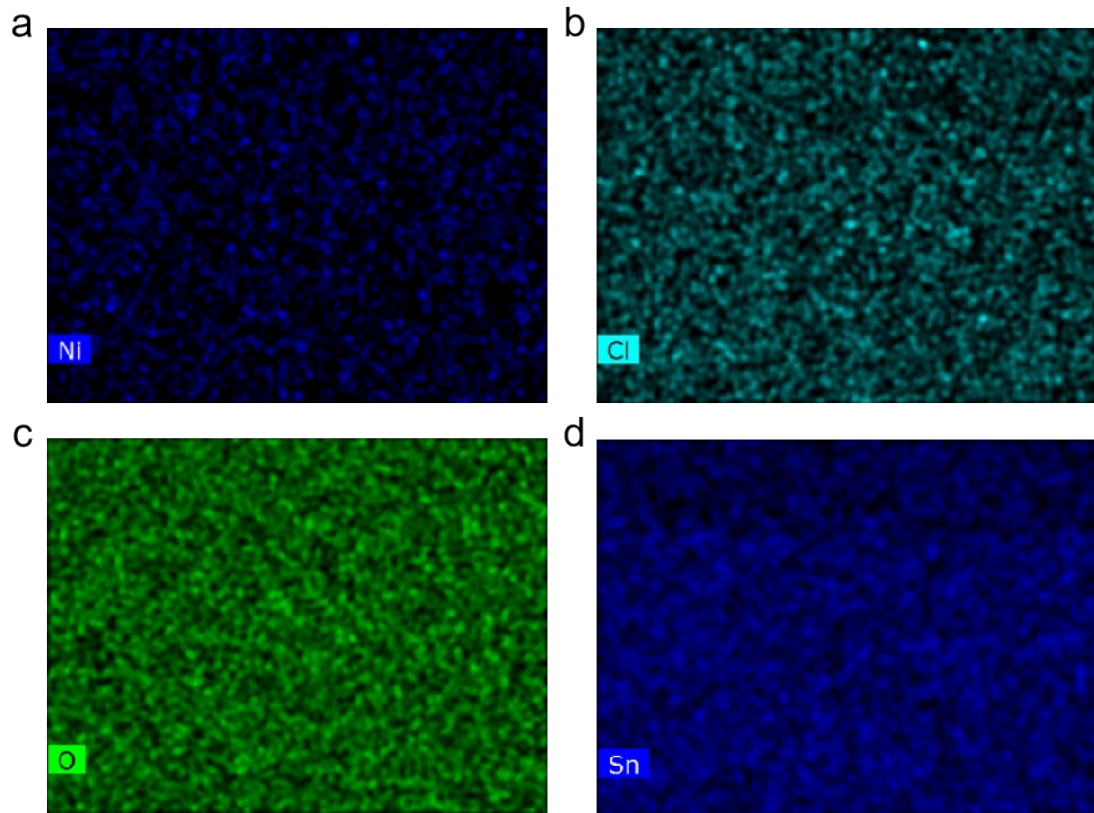

**Fig. S4.** Element distribution analysis of FTO/SnO<sub>2</sub>-NiCl<sub>2</sub> film, EDS mapping of (a) Ni, (b)Cl, (c) O, d) Sn.

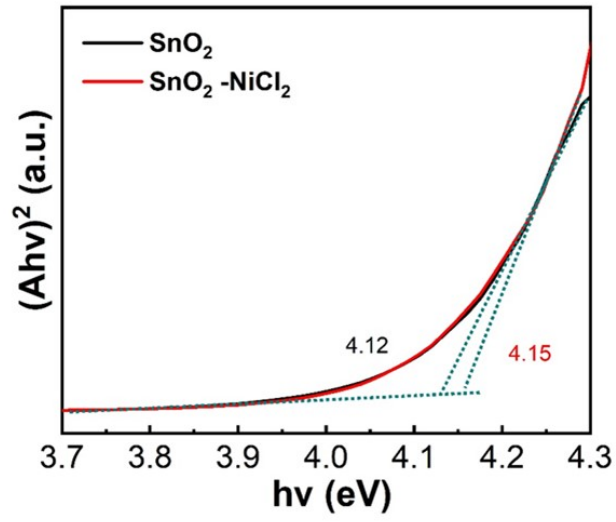

**Figure S5.** UV-Vis spectra of the SnO<sub>2</sub> and SnO<sub>2</sub>-NiCl<sub>2</sub> films.

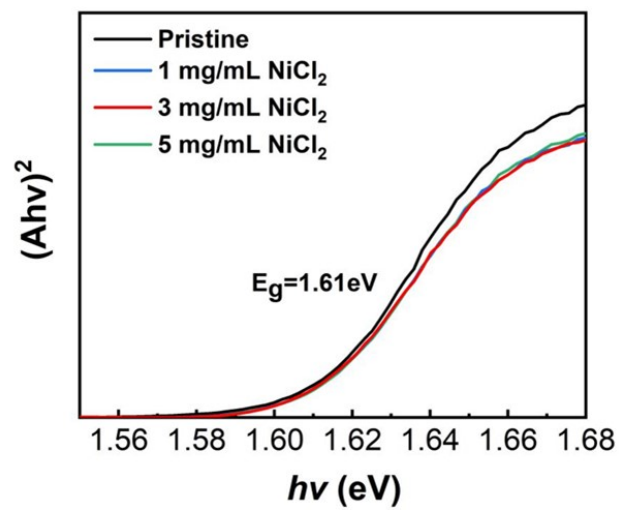

**Figure S6.** UV-Vis spectra of perovskite on the SnO<sub>2</sub> and SnO<sub>2</sub>-NiCl<sub>2</sub> films.

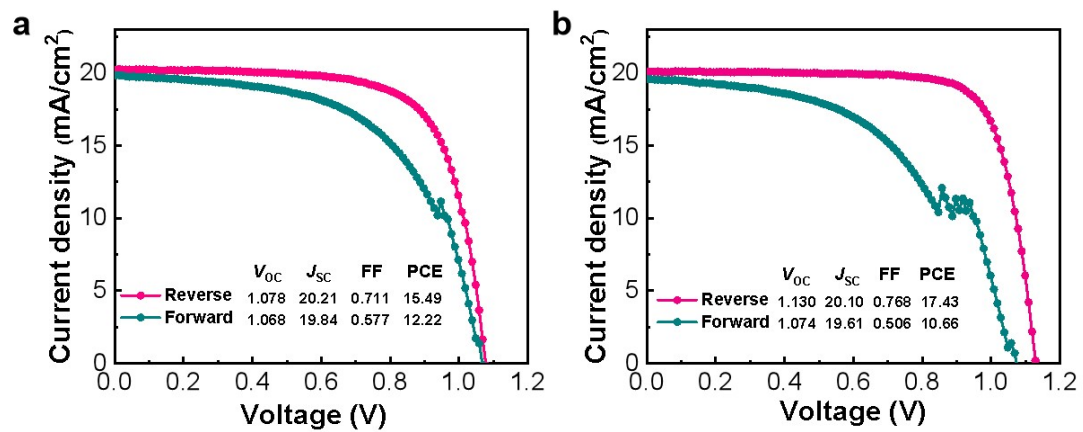

**Figure S7.**  $J$ - $V$  curves of the device of without and with  $NiCl_2$ .

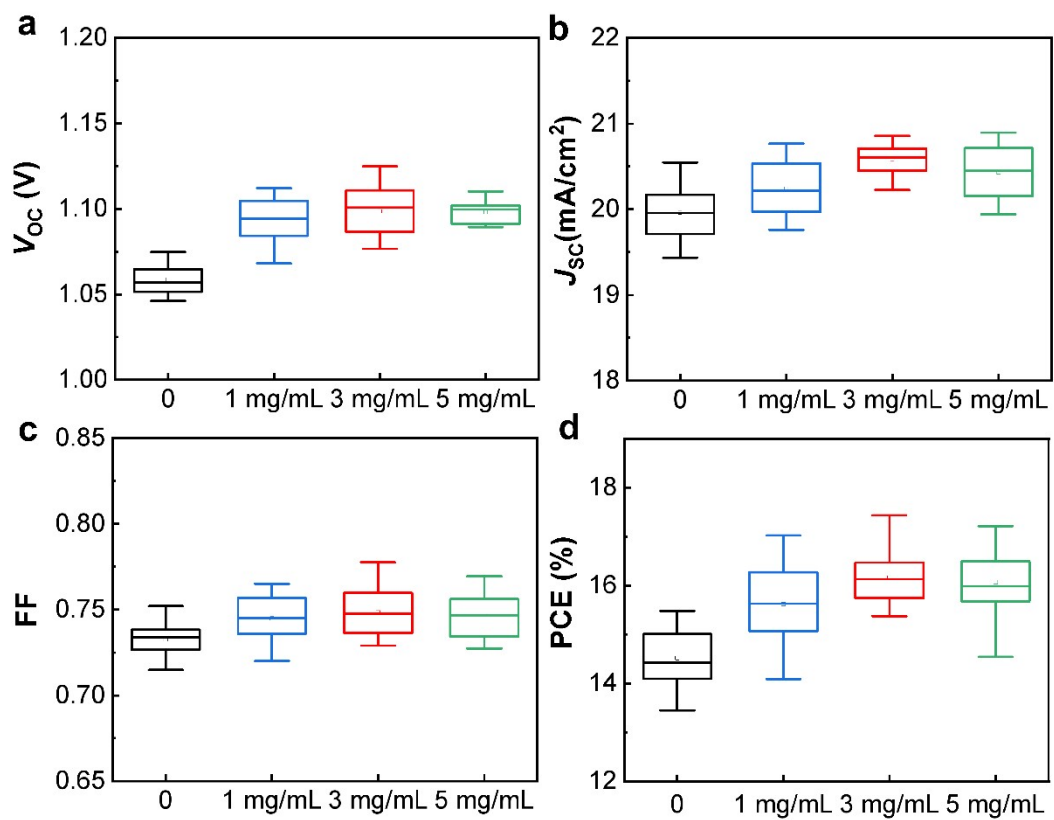

**Figure S8.** (a) Measured  $V_{OC}$ , (b)  $J_{SC}$ , (c) FF, and (d) PCE statistical parameters based on PSCs of different additive concentrations and unmodified PSCs (20 cells for each type).
